# Supplementary material for: Synthesis and Decontamination Effect on Chemical and Biological Agents of Benzoxonium-Like Salts
Source: MDPI journal article supplement (doi:10.3390/toxics9090222), 2021-09-15
Supplement: s1 [file s1]

# Supplementary Materials: Synthesis and decontamination effect on chemical and biological agents of benzonium-like salts.

Aneta Markova, Michaela Hympanova, Marek Matula, Lukas Prchal, Radek Sleha, Marketa Benkova, Lenka Pulkrabkova, Ondrej Soukup, Zuzana Krocova, Daniel Jun and Jan Marek

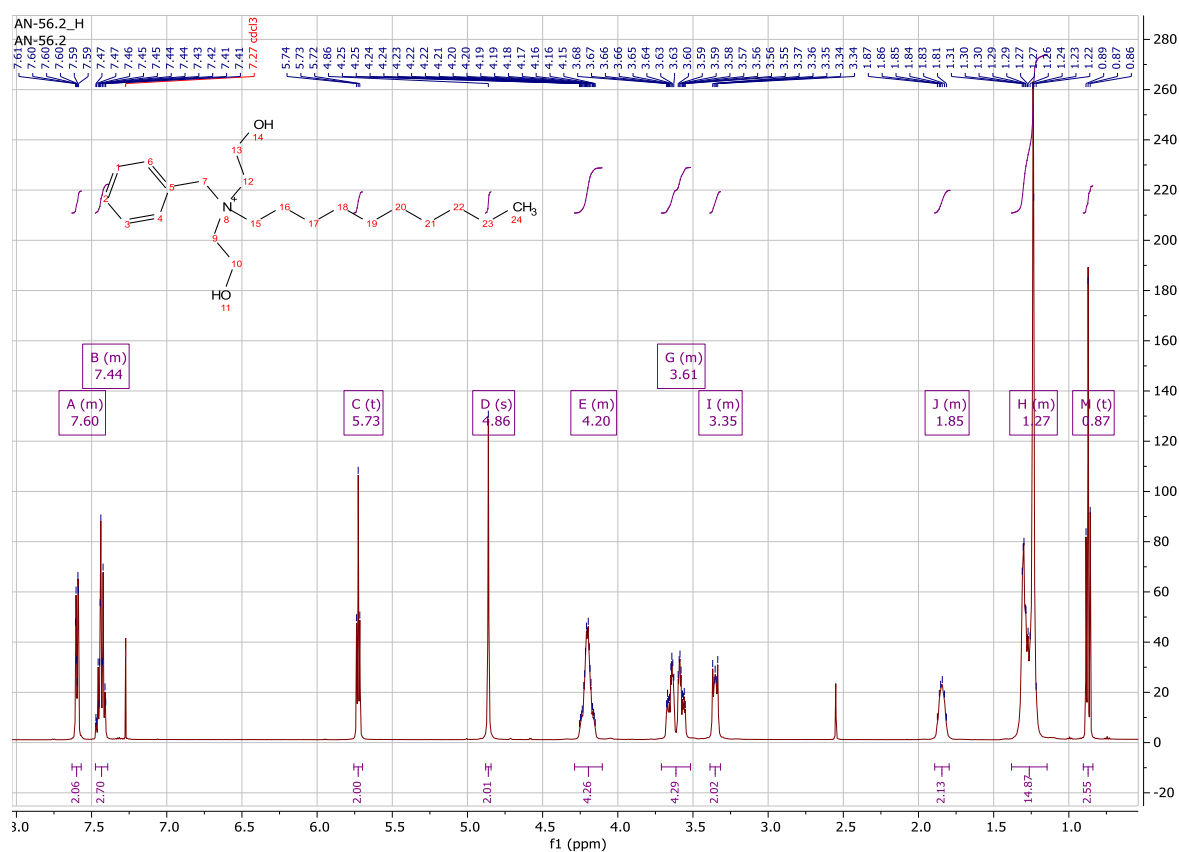

Figure S1. <sup>1</sup>H NMR (500 MHz, Chloroform-d) – 5a

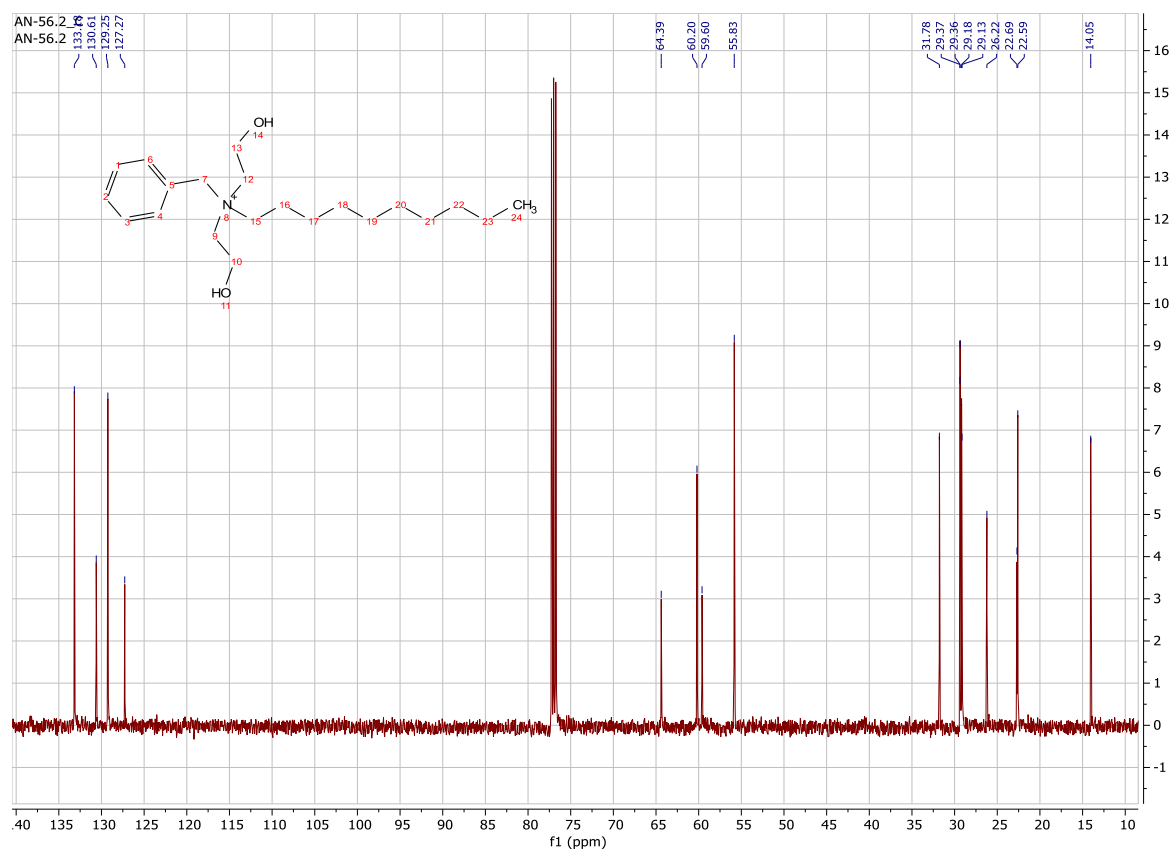

**Figure S2.** <sup>13</sup>C NMR (126 MHz, Chloroform-*d*) – **5a**

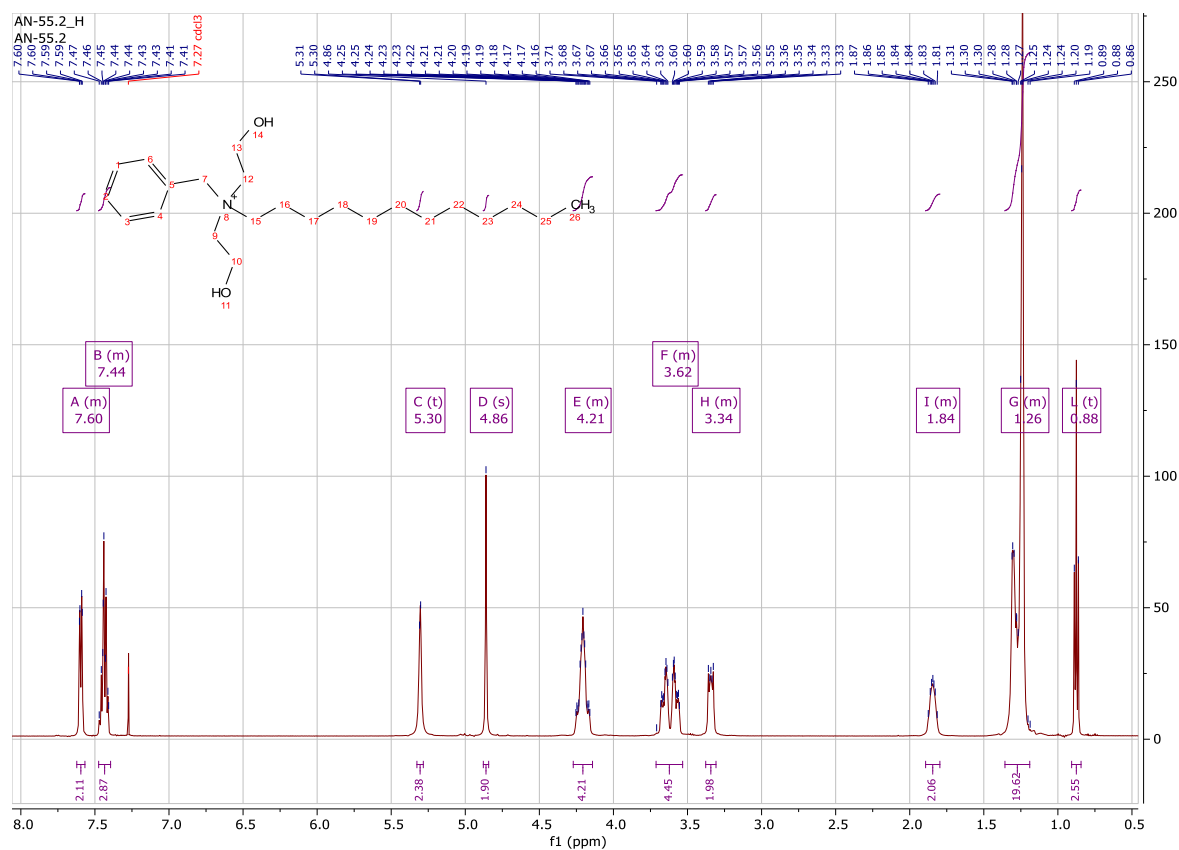

Figure S3. <sup>1</sup>H NMR (500 MHz, Chloroform-*d*) – **5b**

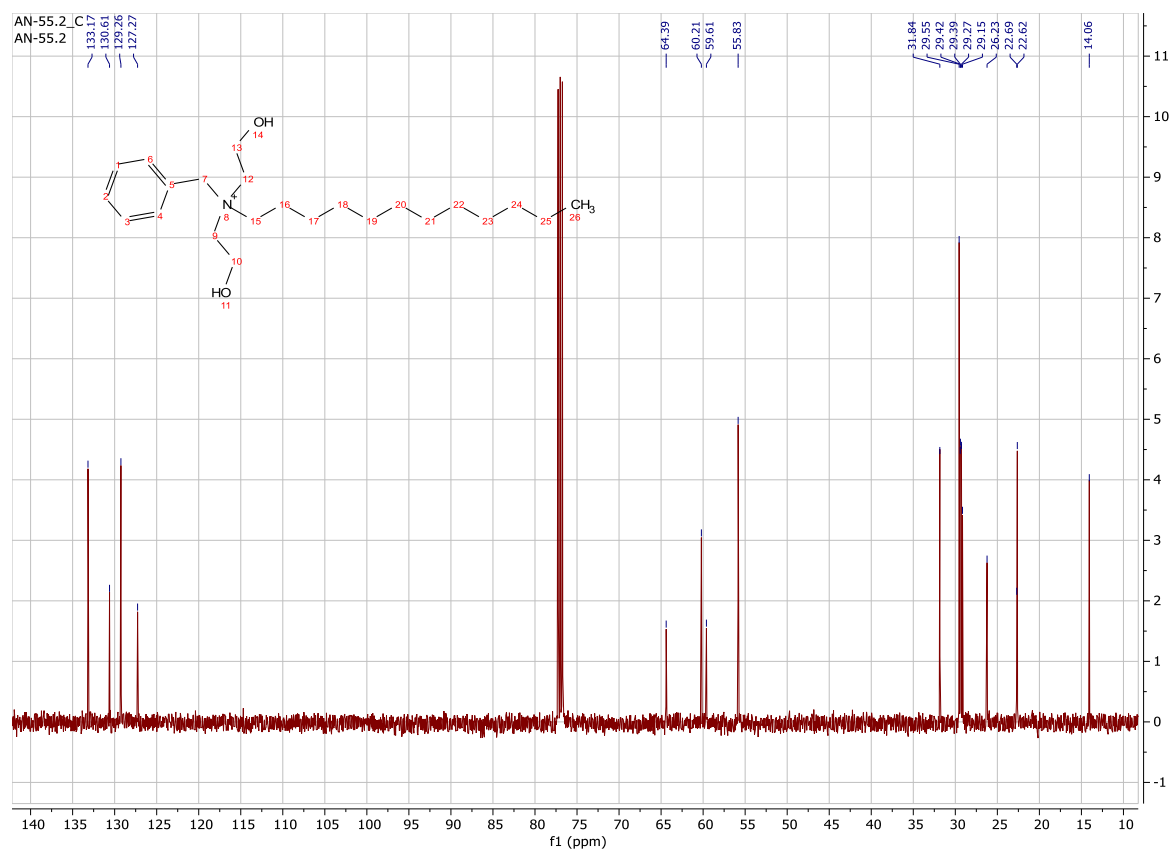

**Figure S4.** <sup>13</sup>C NMR (126 MHz, Chloroform-*d*) – **5b**

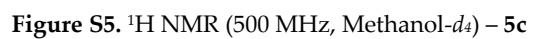

**Figure S5.**  $^1\text{H}$  NMR (500 MHz, Methanol- $d_4$ ) – **5c**

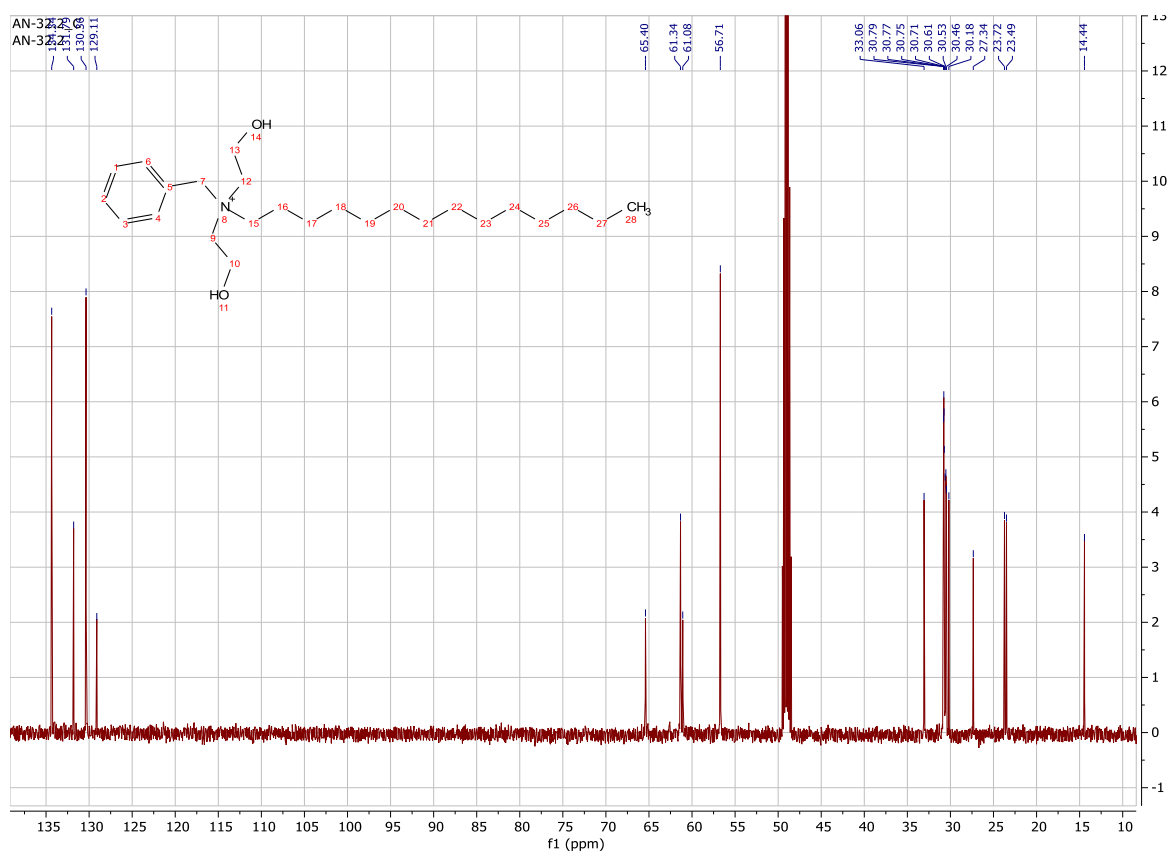

**Figure S6:** <sup>13</sup>C NMR (126 MHz, Methanol-*d*<sub>4</sub>) – 5c

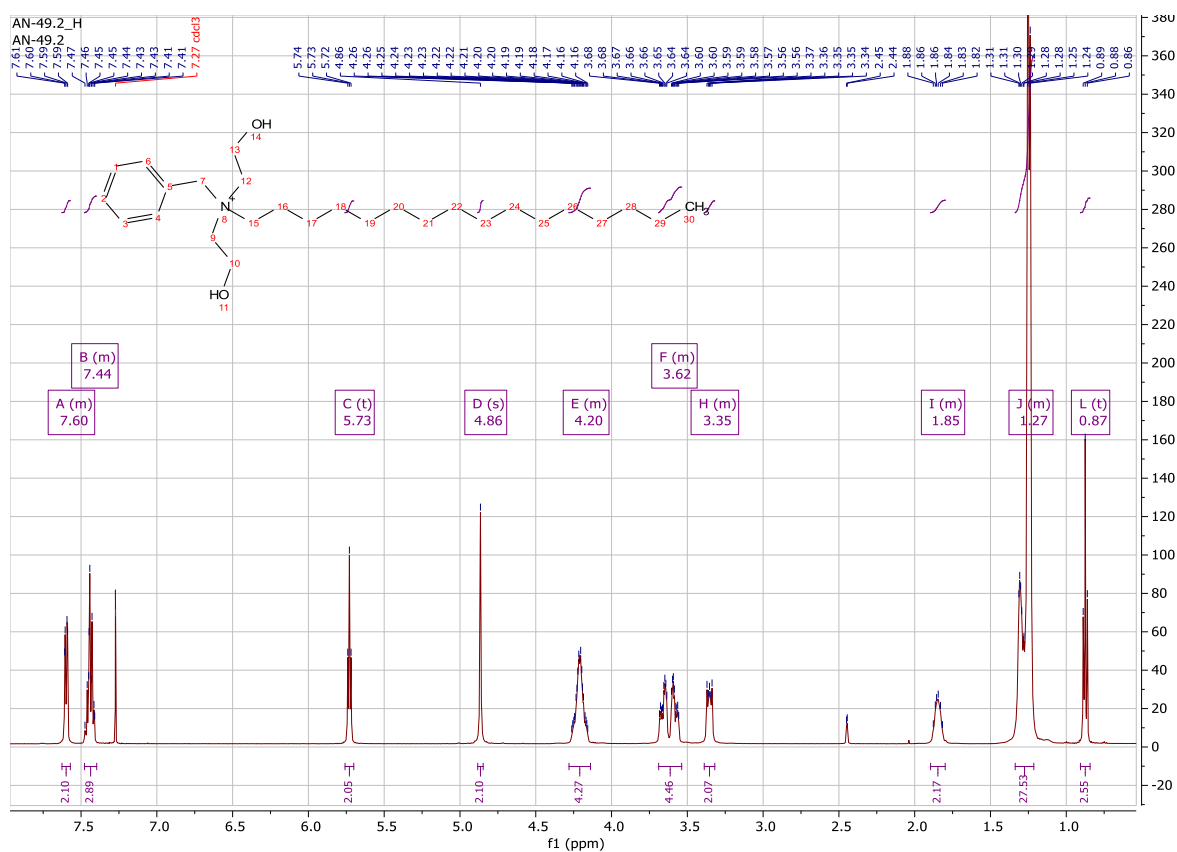

**Figure S7.** <sup>1</sup>H NMR (500 MHz, Chloroform-*d*) – **5d**





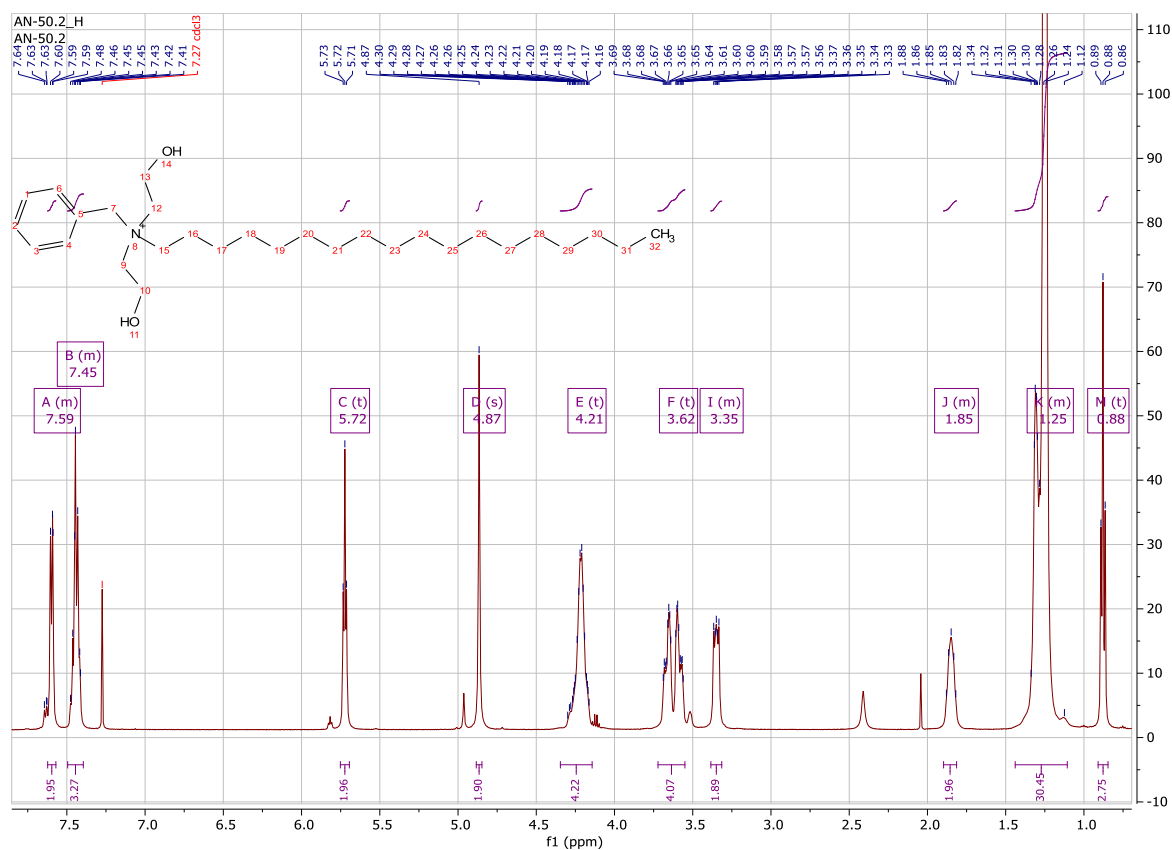

**Figure S9.** <sup>1</sup>H NMR (500 MHz, Chloroform-d) – **5e**

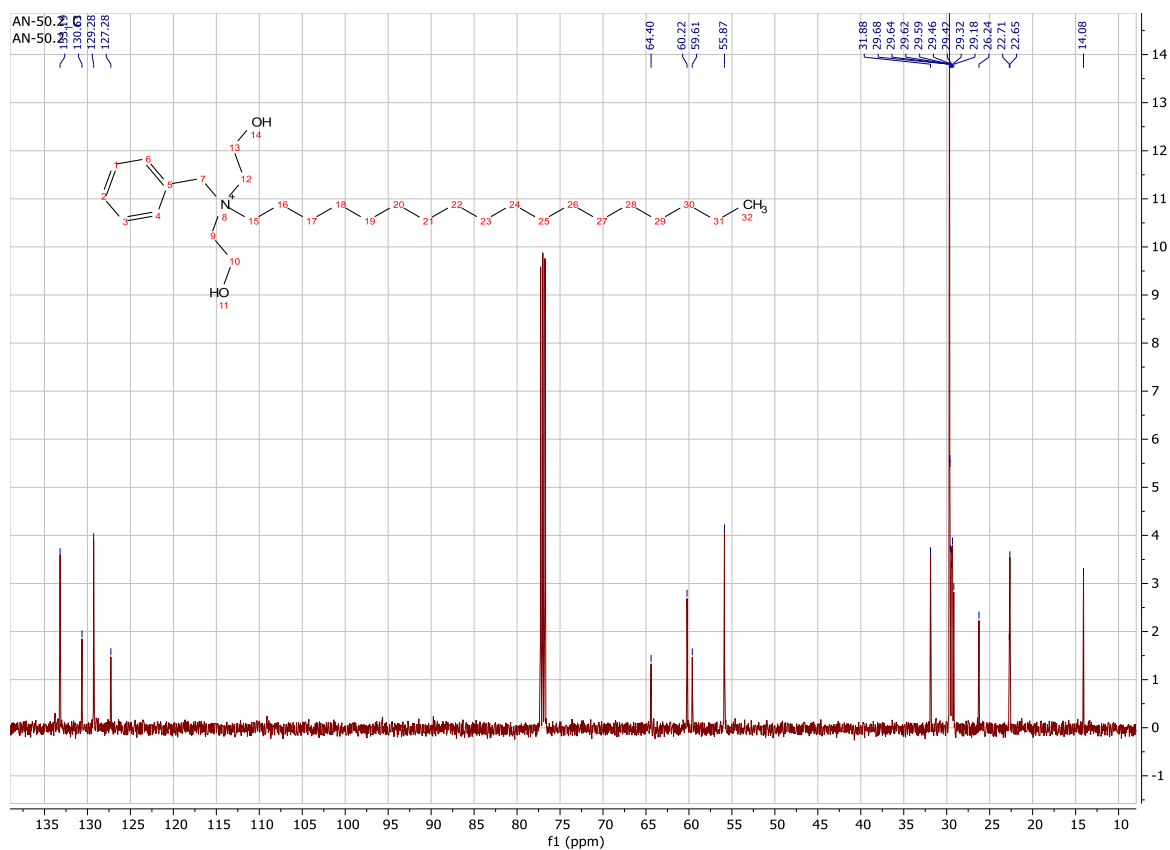

**Figure S10.**  $^{13}\text{C}$  NMR (126 MHz, Chloroform- $d$ ) – **5e**

5a #291 RT: 3.15 AV: 1 NL: 3.00E9  
T: FTMS + p ESI Full ms [105.0000-1000.0000]

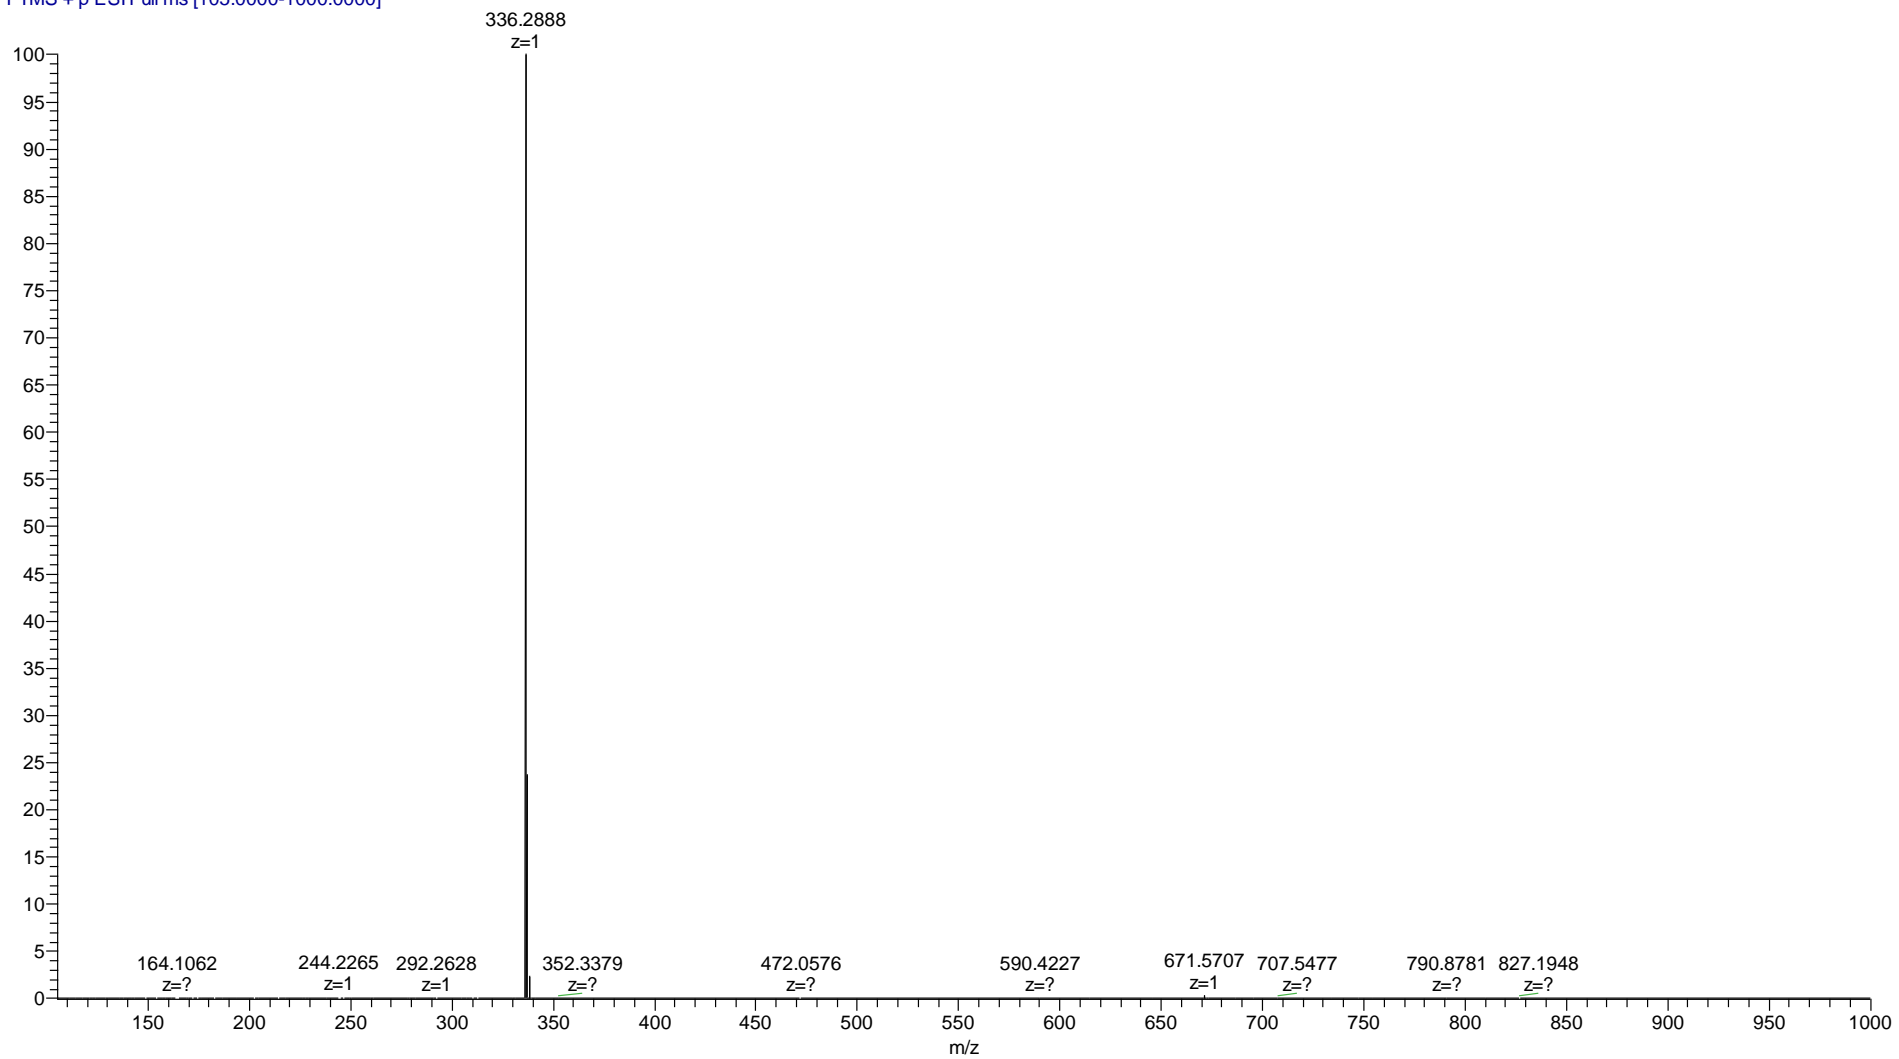

Figure S11. MS spectrum of 5a in R<sub>t</sub> 3.15 min

5b #321 RT: 3.28 AV: 1 NL: 5.79E9  
T: FTMS + p ESI Full ms [105.0000-1000.0000]

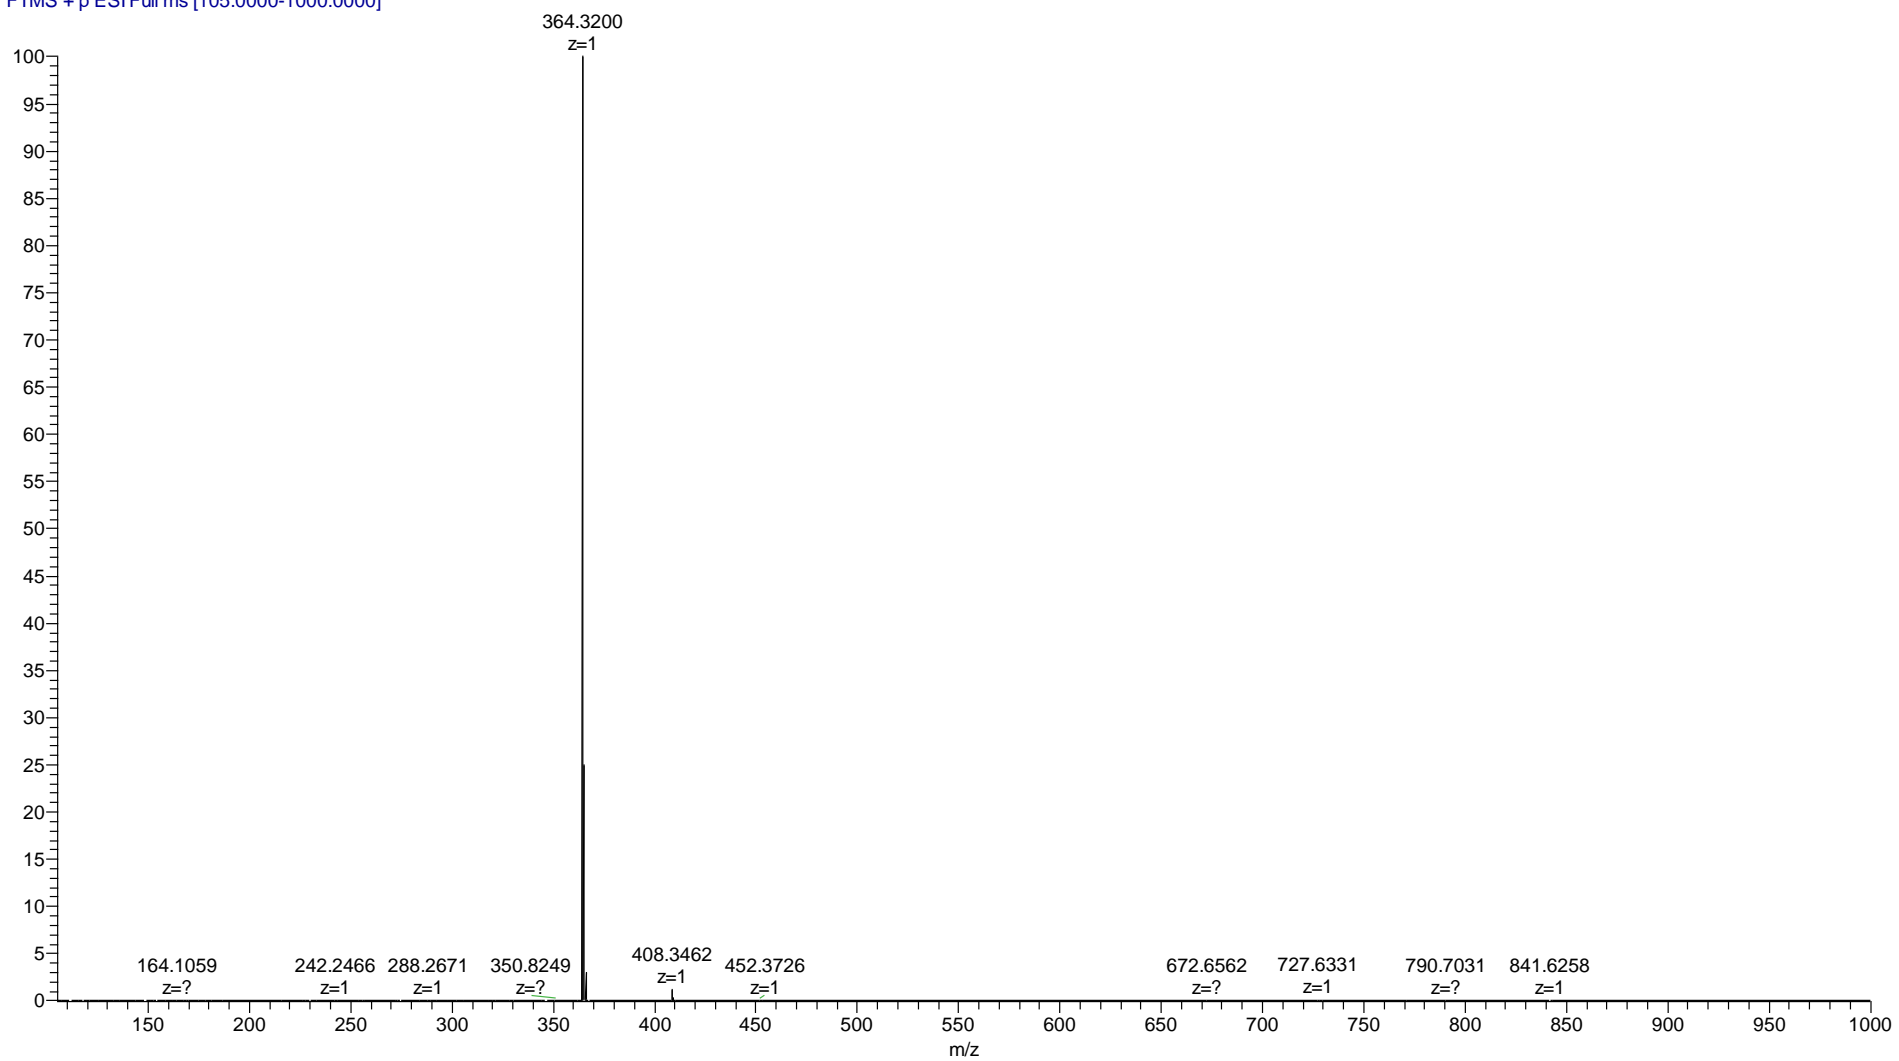

Figure S12. MS spectrum of 5b in Rt 3.28 min

5c #336 RT: 3.46 AV: 1 NL: 5.35E9  
T: FTMS + p ESI Full ms [105.0000-1000.0000]

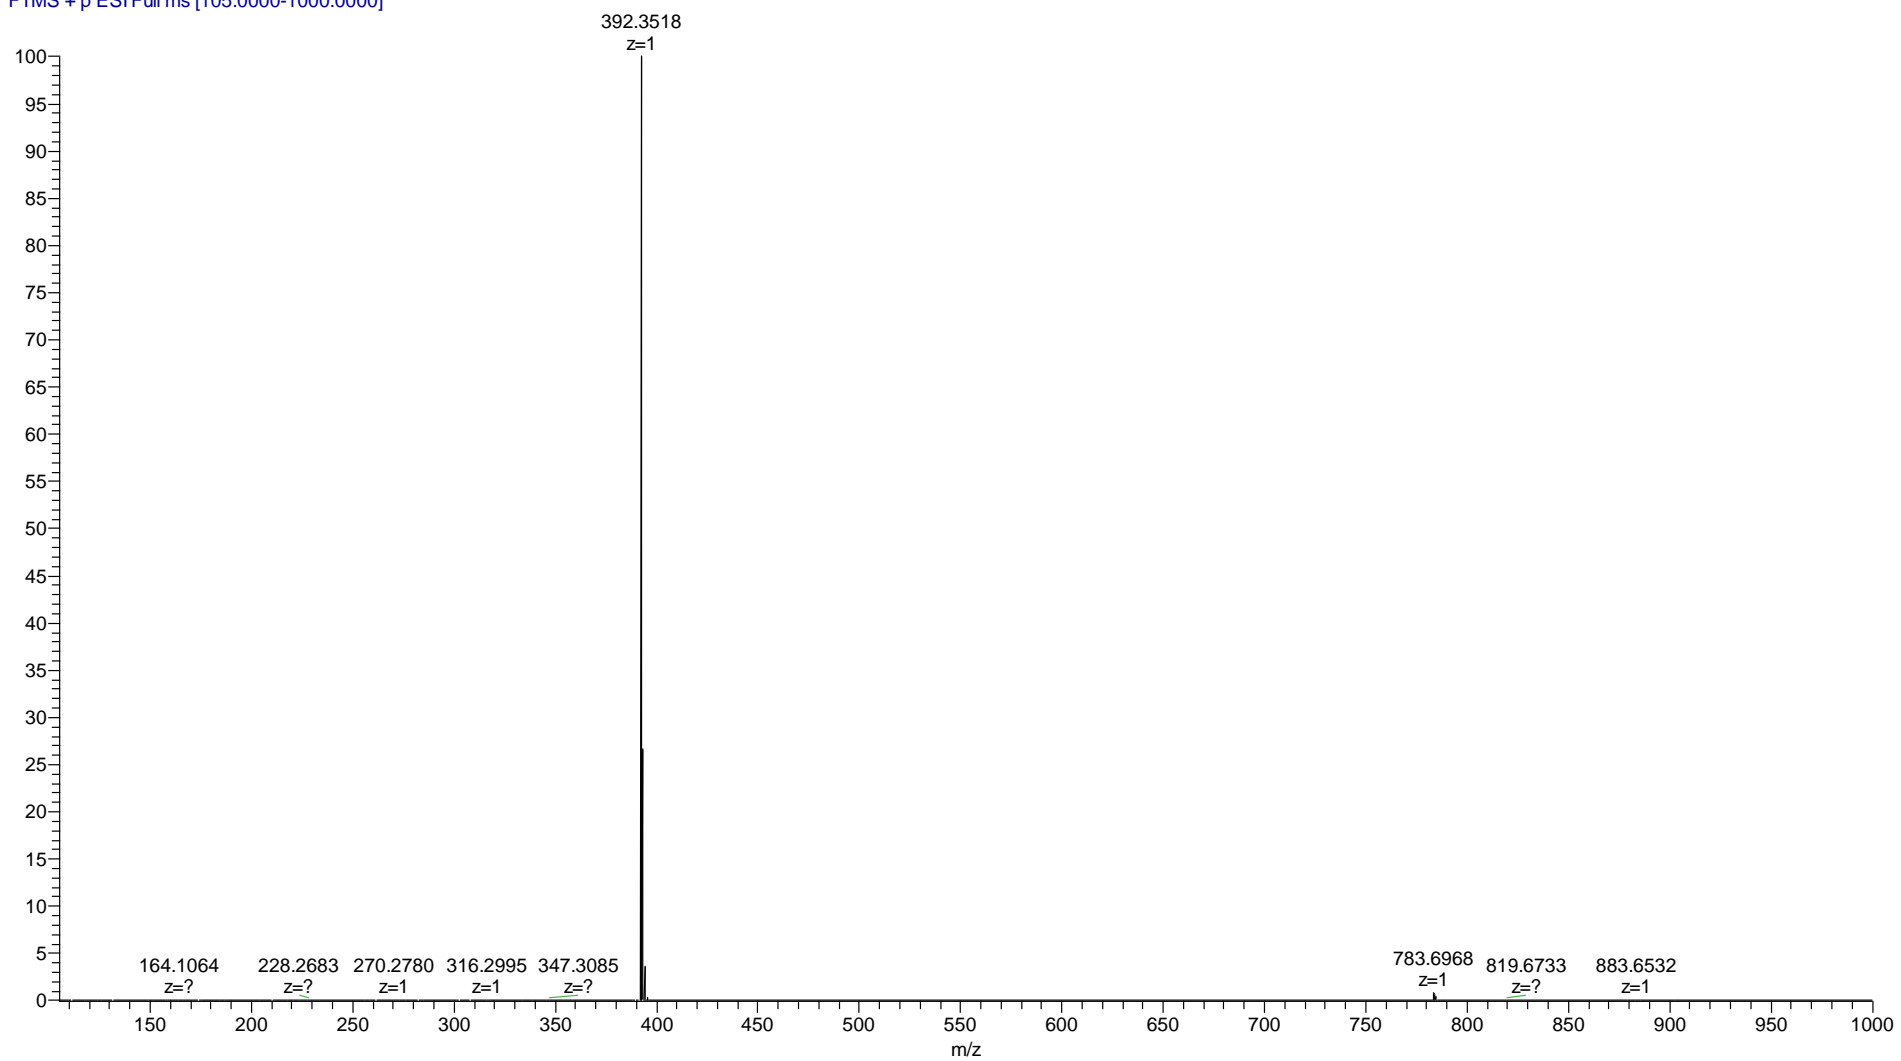

Figure S13. MS spectrum of 5c in Rt 3.46 min

5d #339 RT: 3.64 AV: 1 NL: 7.10E9  
T: FTMS + p ESI Full ms [105.0000-1000.0000]

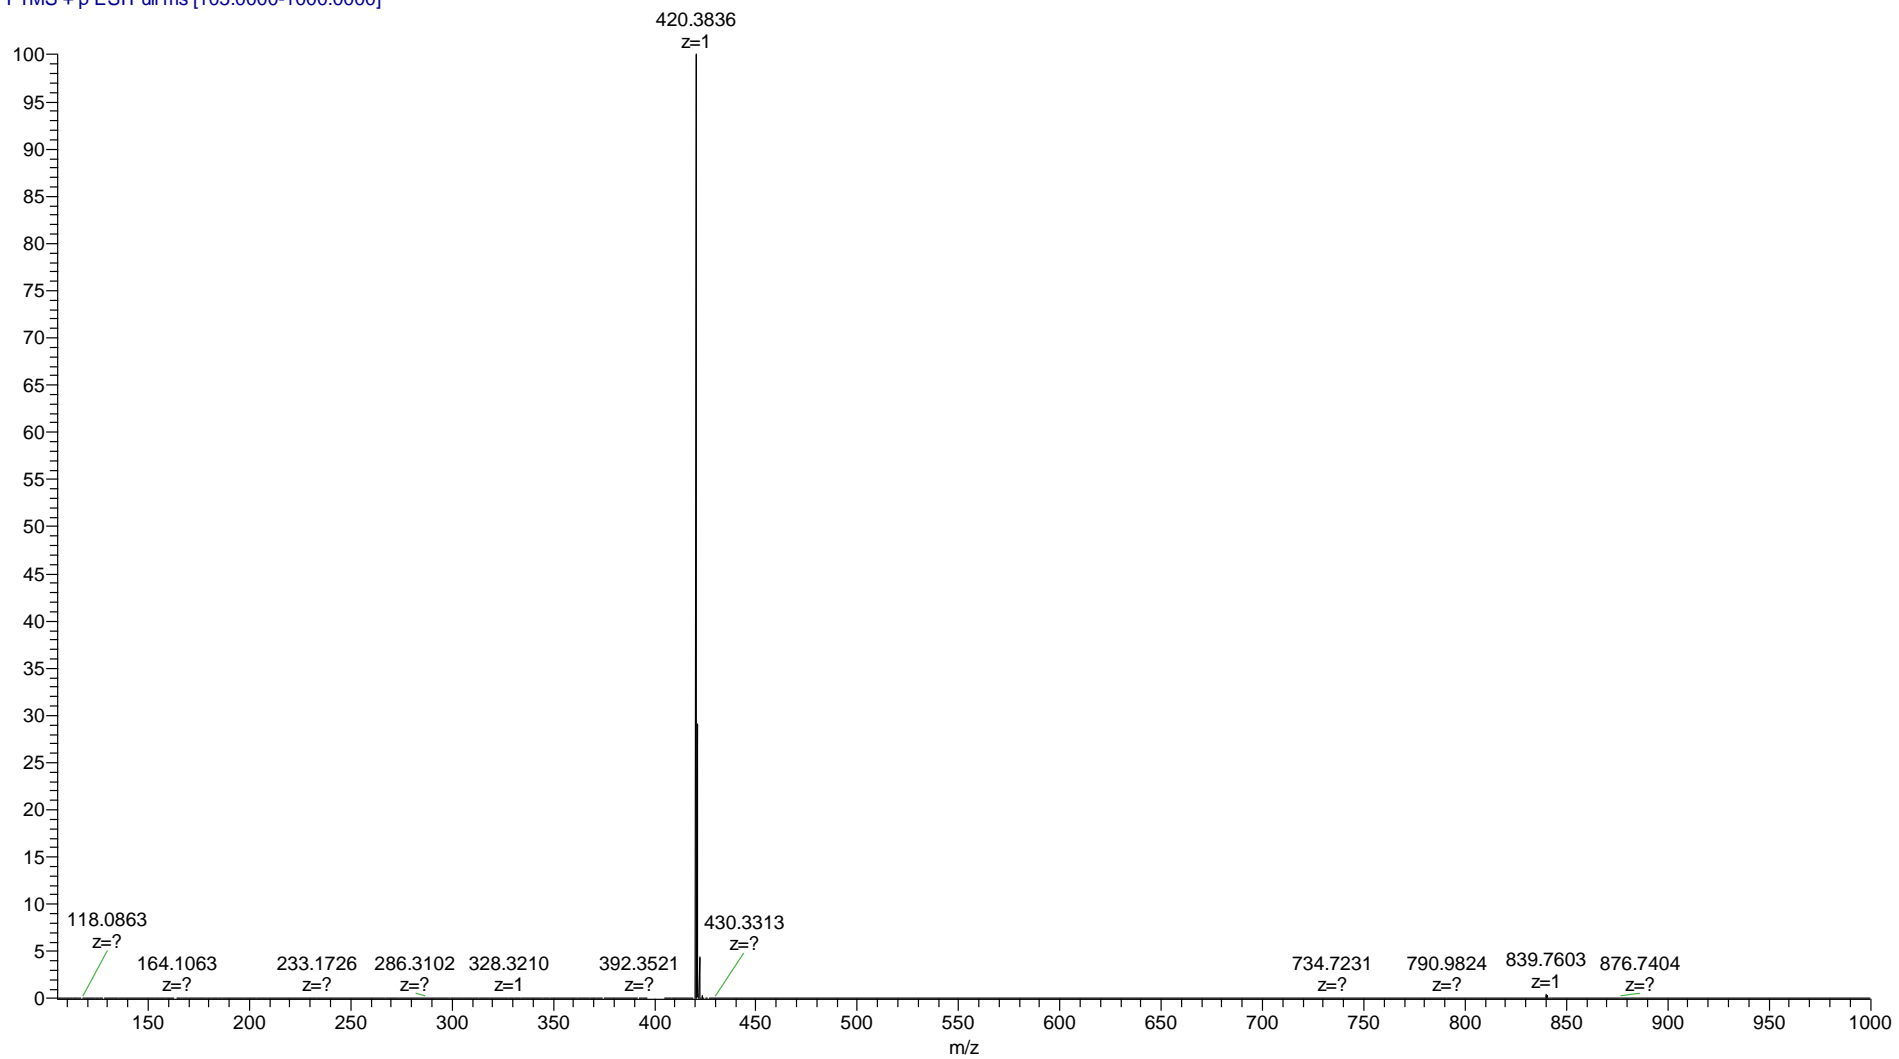

Figure S14. MS spectrum of 5d in Rt 3.64 min

5e #373 RT: 3.84 AV: 1 NL: 2.96E9  
T: FTMS + p ESI Full ms [105.0000-1000.0000]

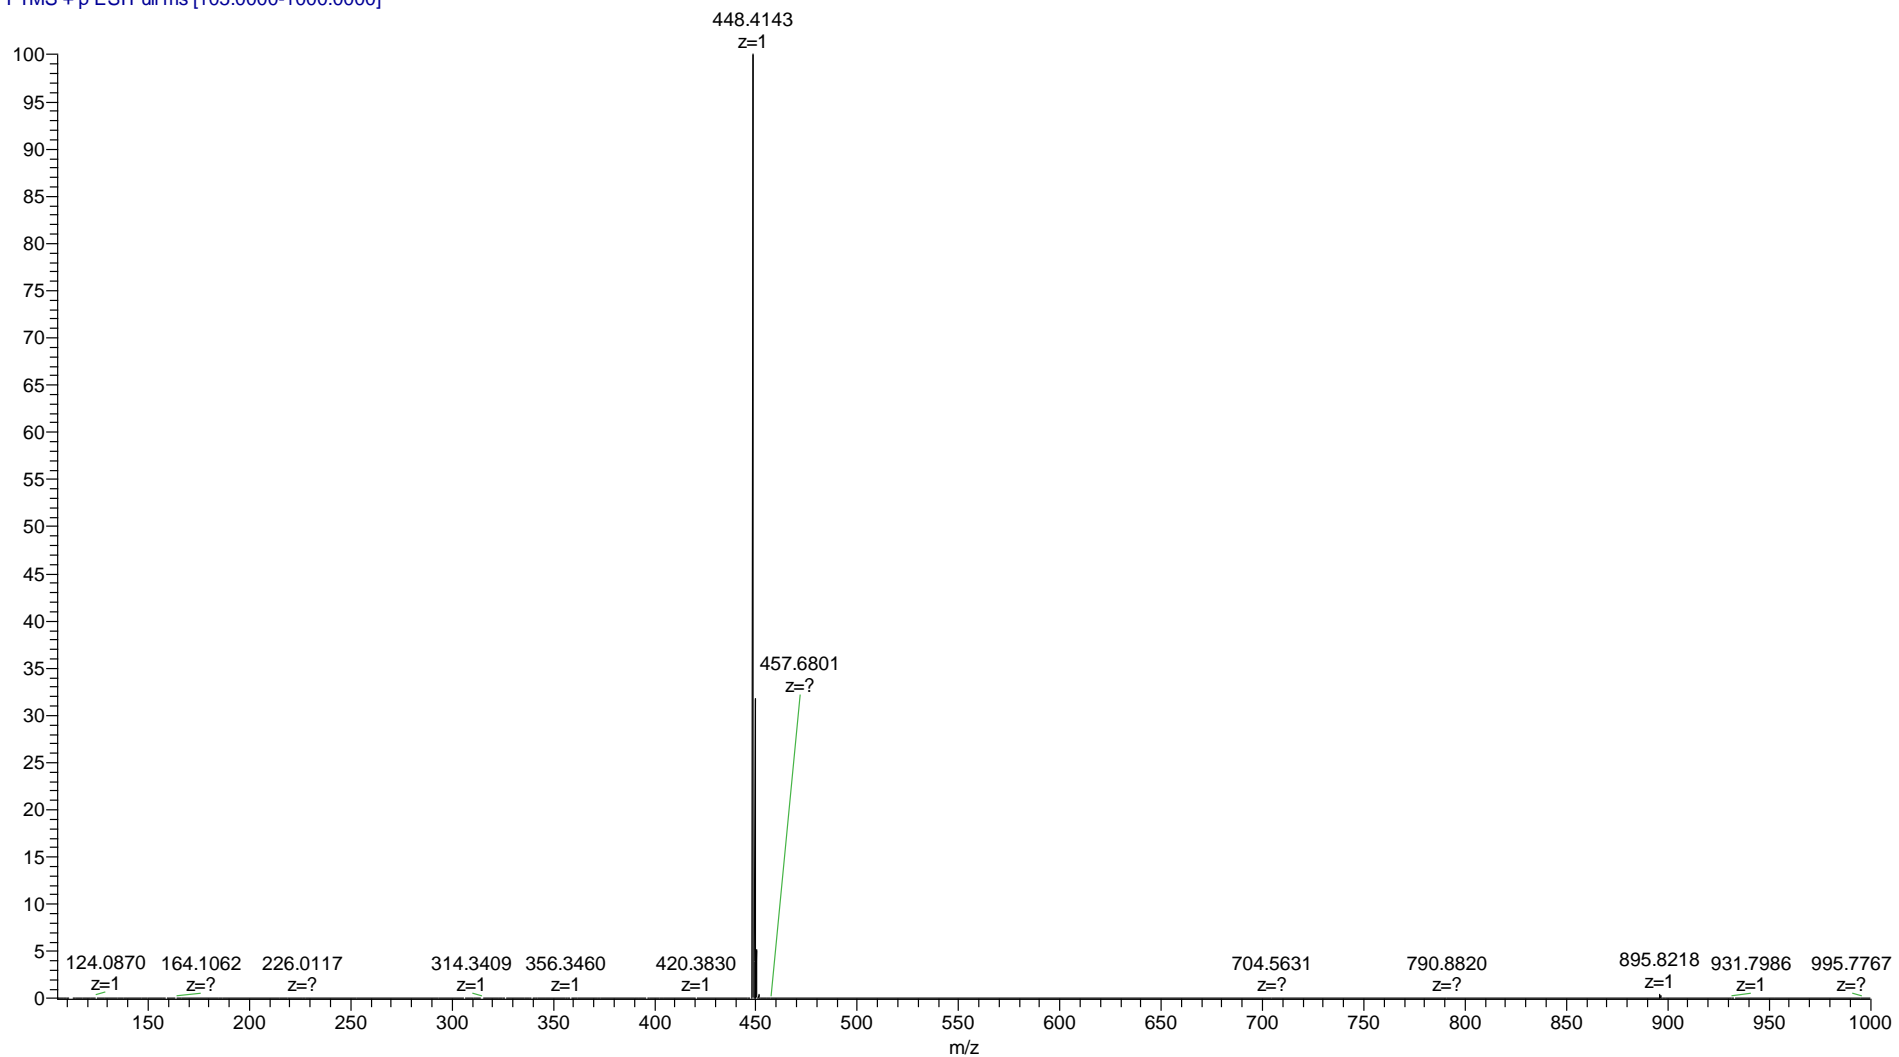

Figure S15. MS spectrum of 5e in R<sub>t</sub> 3.84 min
